# Supplementary material for: Cooperativity of Mus81·Mms4 with Rad54 in the Resolution of Recombination and Replication Intermediates
Source: PubMed Central journal article supplement — J Biol Chem. 2009 Mar 20;284(12):7733–45. doi: 10.1074/jbc.M806192200 (PMC2658067; doi:10.1074/jbc.m806192200), 2009-03-20

## Supplemental Figure Legends

**Supplemental Figure 1. Rad54 binds branched DNA substrates preferentially.** Histogram showing the affinity of Rad54 (50 and 100 nM) towards the indicated substrates (12 nM).

**Supplemental Figure 2. Protein concentration-dependent cleavage of 3' DNA flap by Mus81-Mms4 or Mus81-Eme1.**

The 3' DNA Flap was incubated with Mus81-Mms4 (0.12, 0.25, 0.5, and 1.0 nM in **A**) or Mus81-Eme1 (0.12, 0.25, 0.38, and 0.5 nM in **B**) at 37°C for 20 min. (**C**) and (**D**), histograms showing the data from panel (A) and panel (B) and also those from the 10 min timepoint.

**Supplemental Figure 3. The His<sub>6</sub>-tag on Mms4 has no effect on the functionality of the Mus81-Mms4 complex.**

(**A**) SDS-PAGE of Mus81-Mms4-(His)<sub>6</sub> treated without (lane 1) or with (lane 2) thrombin (0.1 unit, Novagen) in 10 µl of thrombin cleavage buffer (20 mM Tris-HCl, 150 mM NaCl, 2.5 mM CaCl<sub>2</sub>, pH 8.4) for 2 hours at 16°C to remove the (His)<sub>6</sub> tag. (**B**) Mus81-Mms4-(His)<sub>6</sub> and Mus81-Mms4 (0.12, 0.25, 0.38, and 0.5 nM in panel I and panel II, as indicated) were assayed for nuclease activity using the 3' DNA flap (6 nM) as substrate. The reactions were incubated at 37°C for 30 min and then analyzed. (**C**) The 3' DNA flap (6 nM) was incubated with Mus81-Mms4-(His)<sub>6</sub> (0.25 nM in panel I) or Mus81-Mms4 (0.25 nM in panel II) and without or with Rad54 (1, 2, 4, or 8 nM) at 37°C for 30 min and then analyzed.

**Supplemental Figure 4. Enhancement of Mus81-Mms4-mediated D-loop cleavage by Rad54.**

(**A**) The D-loop substrate (6 nM) was incubated with Mus81-Mms4 (0.25 nM) and without or with Rad54 (0.5, 1, 2, 4, or 8 nM) at 37°C for 30 min. The reactions were stopped, deproteinized, resolved in a 20% denaturing PAGE gel containing 7 M urea in TBE buffer (90 mM Tris, 2 mM EDTA, 90 mM Boric acid) and analyzed. The incision point in the D-loop substrate is indicated by the arrow. Since the analysis was done under denaturing conditions, only the labeled ssDNA and cleavage product were detected. (**B**) Graphical representation of the data in (A).

Supplemental Figure 1

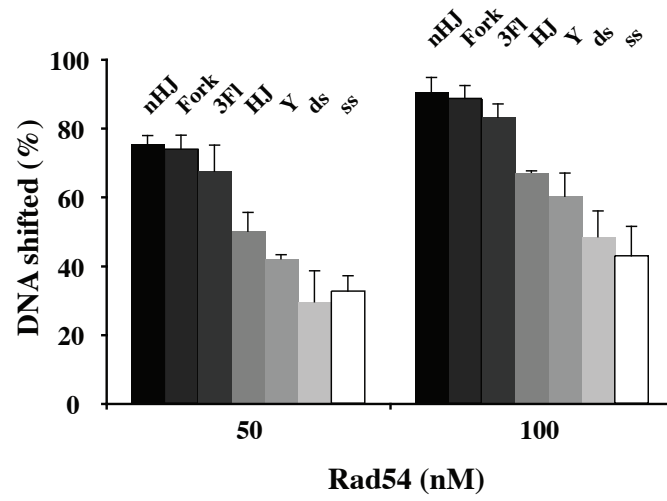

Supplemental Figure 2

**A**

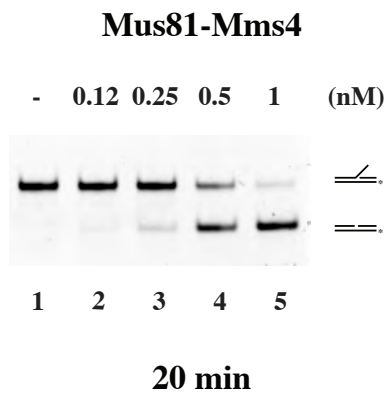

**B**

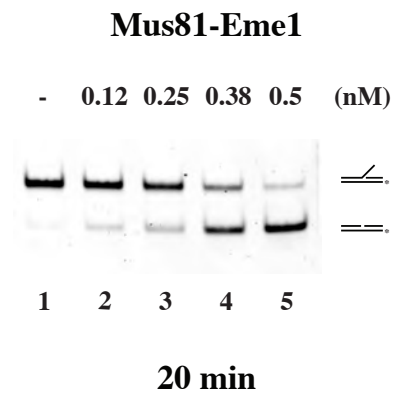

**C**

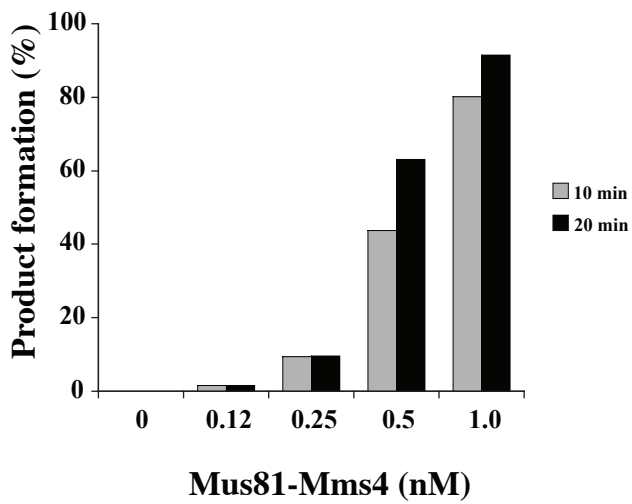

**D**

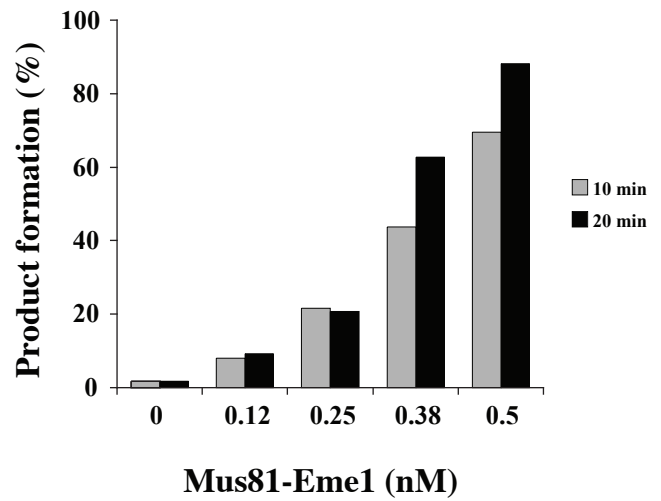

Supplemental Figure 3

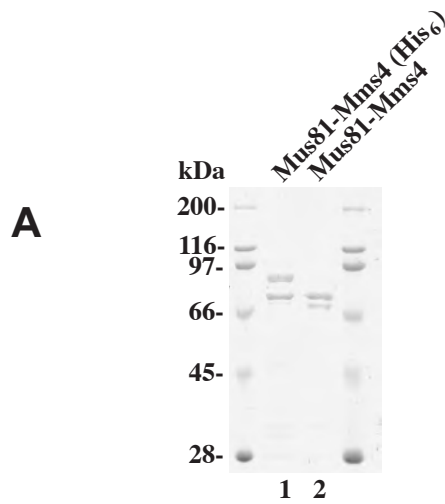

**B**

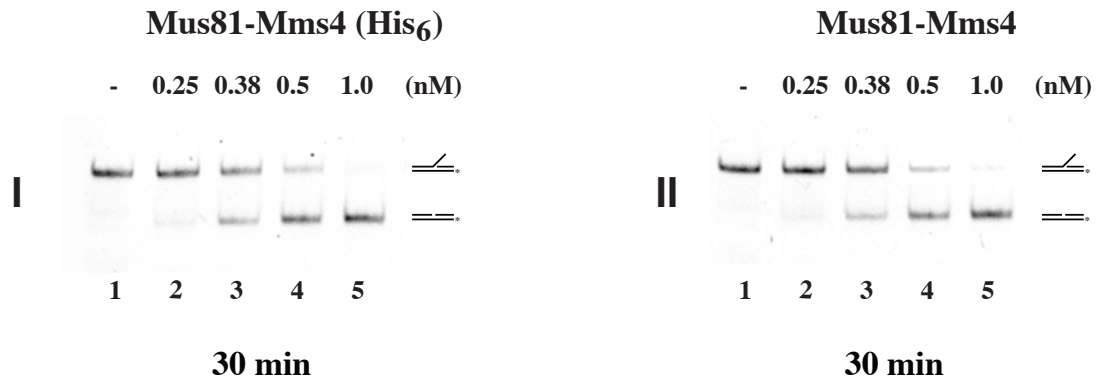

**C**

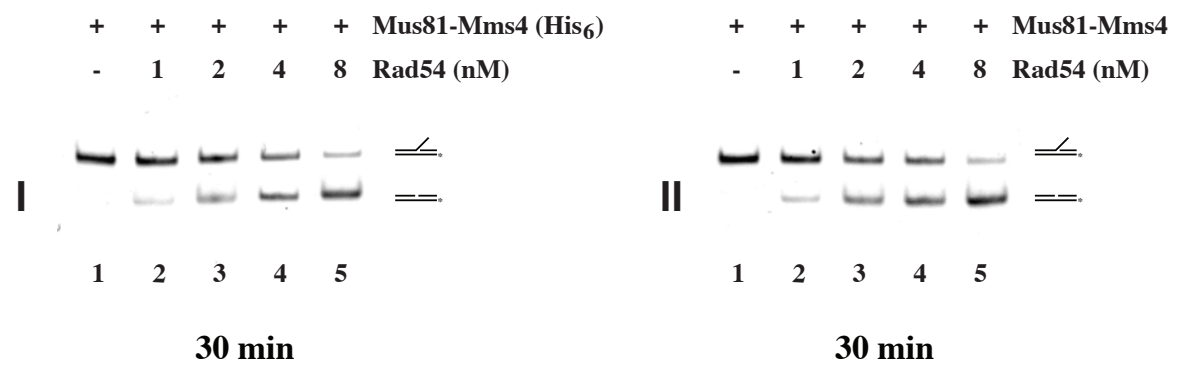

Supplemental Figure 4

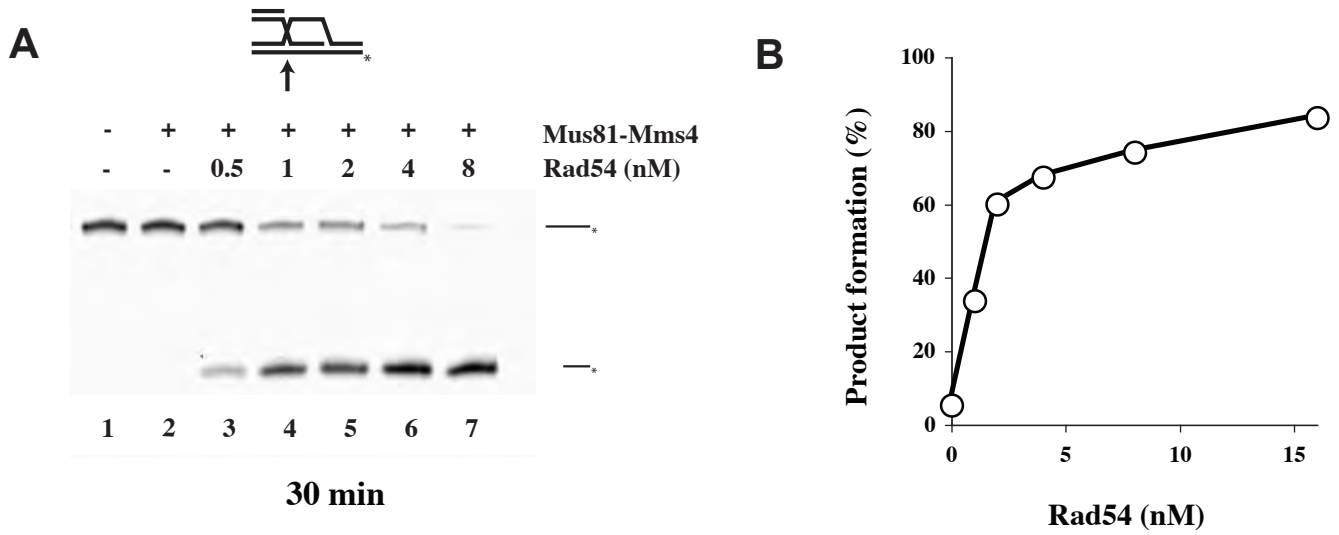

Supplement: M806192200_1.pdf [file M806192200_1.pdf]
